# Supplementary material for: Characteristics of spatial and temporal distribution of heavy rainfall and surface runoff generating process in the mountainous areas of northern China
Source: Copernicus journal article supplement (doi:10.5194/nhess-2024-8), 2024-02-02
Supplement: Supplementary file [file nhess-2024-8-AC1-supplement.pdf]

Dear reviewer,

Thank you for your reviewing our manuscript. Here is our reply to your comments.

Comment 1: The abstract is well structured. It will be beneficial if provide the limitations of the study.

Reply 1: We will revise and add it.

Comment 2: The Introduction is well Structured by Background, problem statement, objectives, and expected results. Nevertheless, it will be better to reorganize the specific research question to link the problem statement.

Reply 2: We will revise and add it.

Comment 3: Other data analysis: The title “Other data analysis” is strange to me. It would be better if the author could name another suitable title instead of that if possible.

Reply 3: This section focuses on the use of statistical methods as related in the manuscript, so we revised it to statistical analysis.

Comment 4: Discussion: The discussion section is a little bit long in my opinion.

Reply 4: We will revise it. In general, the discussion section consists of two parts, the first being the differences between the four surface runoff

processes and the reasons for such differences, which consists of four paragraphs. The second is the impacts on the local and downstream areas of changes in runoff generation of small mountain watersheds due to changes in rainfall patterns, which comprises the remaining four paragraphs. In order to make this section appear more logical, we will revise it by condensing the content of each section, thereby reducing its length.

Comment 5: Some sentences were too long and unclear, making them confusing to readers.

Reply 5: We will scrutinize and revise it.

Comment 6: Grammar uses are wrong in some sentences.

Reply 6: We will scrutinize and revise it.

Comment 7: Some graphs and study area maps included small font sizes and could not be seen properly.

Reply 7: This problem is largely absent in the original manuscript. It may have appeared after uploading it to the system, and this subsequent if will be revised according to the journal and editorial requirements.

Comment 8: In addition, by giving the main points of each background,

problem statement, research question, objectives, methods, results, discussion, and conclusions,

It will be clearer and make the readers get the points faster and reduced the pages.

Reply 8: We will restructure the manuscript appropriately according to this order.
